# Supplementary material
Source: publisher figshare collection journal article supplement (https://karger.figshare.com/ndownloader/files/15050333)
Supplement: Supplementary file 1 [file 15050333]

Supplementary Table 1. Condition of PCR amplifications.

| Gene fragment | Primer sequences | Anneal. temp. (ºC) | Amplicon length (bp) |
| --- | --- | --- | --- |
| AR - first part of exon 1 | F: ATCGCAGCCTGTTGAACTCT | 58 | 907 |
| R: AGCGGGGCGTACATACAA |
| AR - second part of exon 1 | F: CTAGGTGGCAGTTCGACCAT | 58 | 939 |
| R: CACCGACTAGGGTGATTCAAA |
| *AR* - exon 2 | F: TTATCTCTGCCAGCCACTGA | 58 | 321 |
| R: GGGTCCTACCAGTGACCTTG |
| *AR* - exon 3 | F: CCTTATGCCCTTTCTGCCTA | 58 | 334 |
| R: TGAAGGAGTCAGTCTGTATCTAGAGC |
| *AR* - exon 4 | F: CTTAGGCAACCTTTCTCACAGG | 58 | 500 |
| R: ATACCAATCCCTCCCCTTCA |
| *AR* - exon 5 | F: GAGTGCCAGTGGTTCTCACC | 58 | 302 |
| R: ACCACCCCCAGTCAGGTC |
| *AR* - exon 6 | F: AGCACCACCCAGAGAAACTG | 58 | 402 |
| R: AGGAGGGAGGGTGAATGAAG |
| *AR* - exon 7 | F: GGGGTCAAGTTTGTGGTCAG | 58 | 387 |
| R: CCTGGGCCACATTCATATTC |
| *AR* - exon 8 | F: AGAGCCTGACTGAAGCCAAC | 58 | 393 |
| R: GGGGGAAAGTACAGCAAATAGA |
|  | | | |
| *MAMLD1* - exon 3 | F: CCCTAAGCCCTGTGTCTAGGT | 58 | 268 |
| R: GCCAACAAGTTTGCACAGAG |
| *MAMLD1* - first part of exon 4 | F: TCTATCTGCCACAGGGAACC | 60 | 648 |
| R: CCGAGGGGATCACGTAGTT |
| *MAMLD1* - second part of exon 4 | F: AACTACGTGAT CCCCTCGG | 58 | 612 |
| R: CAGAGCAGATAGCAGGTGGC |
| *MAMLD1* - third part of exon 4 | F: GCCACCTGCTATCTGCTCTG | 58 | 666 |
| R: ACGCGAGTCGTCTTACCTGT |
| *MAMLD1* - exon 5 | F: GCTACACCAAAGCCAAGTCC | 58 | 257 |
| R: CTGTTGAACTGAGCCGACTG |
| *MAMLD1* - first part of exon 6 | F: GGCAGTTTCGAAGAGTCGAG | 58 | 613 |
| R: CCTGGGCCAAGACAGAGTT |
| *MAMLD1* - second part of exon 6 | F: AGTCCCCACCAGCTCAGAC | 58 | 793 |
| R: GGGTTGTGAATTTGCAGAGG |
|  | | | |
| *SRD5A2* - exon 1 | F: CGTCTAGCGCCCCATAAAG | 58 | 407 |
| R: CAACCGCTACCTGTGGAAGT |
| *SRD5A2* - first part of exon 2 | F: GGGTTTGATGCAATTGTCTG | 60 | 459 |
| R: ATTCTCAGGTGCGGAGTGAC |
| *SRD5A2* - second part of exon 2 | F: TCTTTCCTGTCTCCAGGACATT | 60 | 241 |
| R: TTTAGGCTGTGGGAAGTGGT |
| *SRD5A2* - exon 3 | F: TGGGACAATGGCTAATTGGT | 60 | 402 |
| R: AGGAGAAGTCAGGGGCAAAT |
| *SRD5A2* - exon 4 | F: AGCAGCAGTGGGTGCTACTC | 60 | 503 |
| R: AGTTCAGTGAAAGCCCAGGA |
| *SRD5A2* - exon 5 | F: GAGAAAGGAGGTGGGCAAAT | 60 | 831 |
| R: AGCCAGAGGAGCTGAGACAG |
|  | | | |
| *SRY* | F: CTTTCCAACTTCCCTCCGTA | 57 | 813 |
| R: GGACGTTTCGTTAGCCAGAG |
